# Supplementary material for: Optimisation of partial least squares regression calibration models in near-infrared spectroscopy: a novel algorithm for wavelength selectionElectronic supplementary information (ESI) available: Figures of the effects of removing spectral windows on partial least squares regression. See http://www.rsc.org/suppdata/an/b3/b309233j/
Source: Royal Society of Chemistry journal article supplement (doi:10.1039/b309233j), 2003-01-01
Supplement: b309233j.doc [file b309233j.doc]

**ELECTRONIC SUPPLEMENTARY INFORMATION**

**Optimisation of Partial Least Squares Regression Calibration Models in Near-Infrared Spectroscopy: a Novel Algorithm for Wavelength Selection**

Mark R. Smith*a, Roger D. Jeea, Anthony C. Moffata, David R. Reesb and Neville W. Broadc

*a. Centre for Pharmaceutical Analysis, The School of Pharmacy, University of London, 29/39 Brunswick Square, London, UK WC1N 1AX. E-mail: mark.smith@ulsop.ac.uk*

*b. Cardinal Health Oral Technologies (Zydis), Frankland Road, Blagrove, Swindon, Wiltshire, UK SN5 8RU*

*c. Pfizer Ltd., Process Analytical Support Group, Ramsgate Road, Sandwich, Kent, UK CT13 9NJ*

**Figures**

**Fig. S1** Plot of the mean value of normalised critical parameters (SEC of the calibration set, explained variance of the PLSR calibration model, RMSEP of the robustness set, and bias of the robustness set) as a function of window size for region A.

a

b

c

**Fig. S2** The effect of removing different sizes of spectral window from PLSR calibration model development around the central point ~1472 nm (─), region D, or around the central point ~1504 nm (---), region C, on (a) SEC of the calibration set, (b) explained variance of the PLSR calibration model, (c) RMSEP of the robustness set and (d) bias of the robustness set.

d

**Fig. S3** The local effect of removing different sizes of spectral window from PLSR calibration model development around the central point ~1472 nm (─), region D, or a spectral window around the central point ~1504 nm (---), region C, on the bias of the robustness set.
